# Supplementary material for: Safely Managed On-Site Sanitation: A National Assessment of Sanitation Services and Potential Fecal Exposure in Indonesia
Source: MDPI journal article supplement (doi:10.3390/ijerph18158204), 2021-08-03
Supplement: s1 [file s1]

## Supplemental Materials:

### Is it safely managed? A national assessment of on-site sanitation services and potential fecal exposure in Indonesia

Mitsunori Odagiri<sup>1</sup>, Ann Thomas<sup>1</sup>, Maraita Listyasari<sup>1</sup>, Freya Mills<sup>2</sup>, Robert Bain<sup>3</sup>, Muhammad Zainal<sup>1</sup>, Tom Slaymaker<sup>3</sup>, Aldy Mardikanto<sup>4</sup>, Anita Gultom<sup>5</sup>, Asri Indiyani<sup>6</sup>, Hasnani Rangkuti<sup>7</sup>, Juliet Willetts<sup>2</sup>

<sup>1</sup> UNICEF Indonesia, Indonesia

<sup>2</sup> Institute for Sustainable Futures, University of Technology Sydney, Australia

<sup>3</sup> UNICEF New York, USA

<sup>4</sup> National Development Planning Agency (Bappenas), Government of Indonesia, Indonesia

<sup>5</sup> Ministry of Health, Government of Indonesia, Indonesia

<sup>6</sup> Ministry of Public Work and Housing, Government of Indonesia, Indonesia

<sup>7</sup> National Bureau of Statistics (BPS), Government of Indonesia, Indonesia

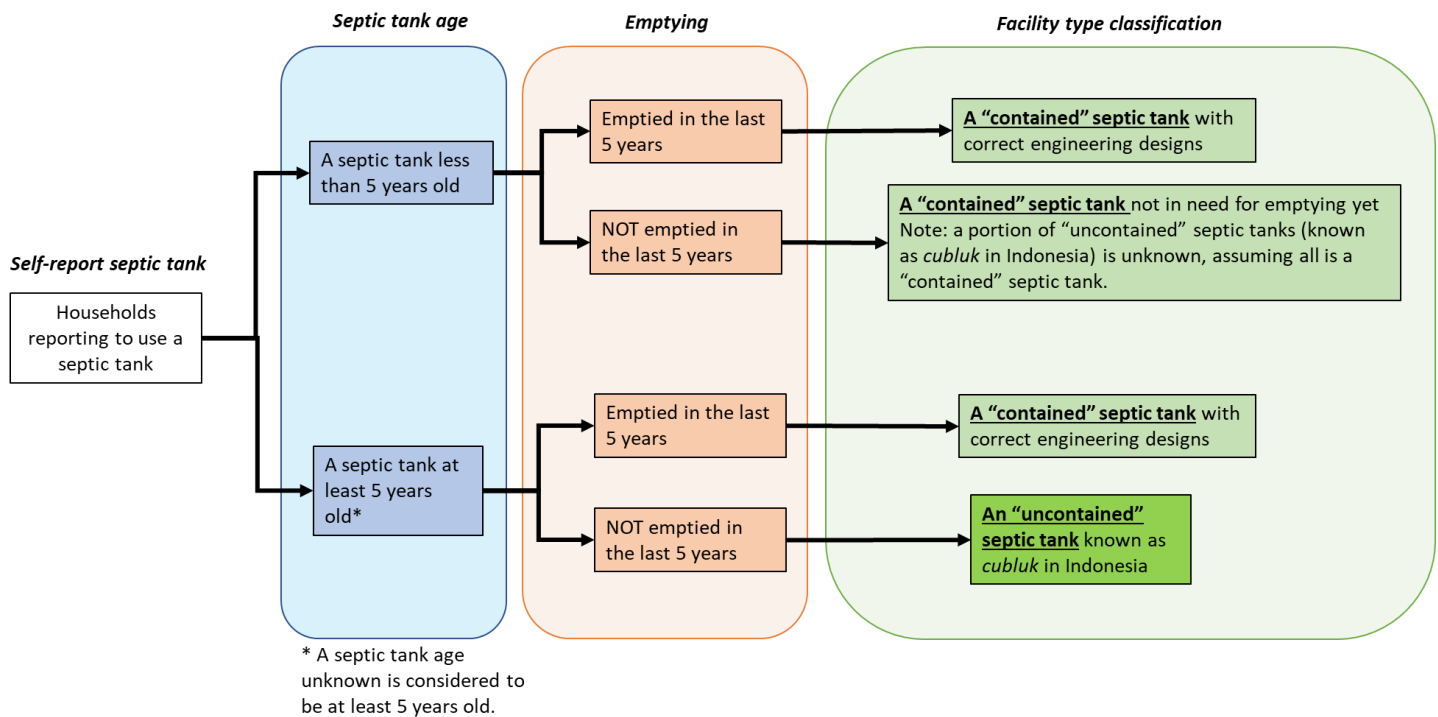

**Figure S1.** Septic tank and leach pit classification flow chart based on the national socio-economic survey questions for self-report septic tank households.

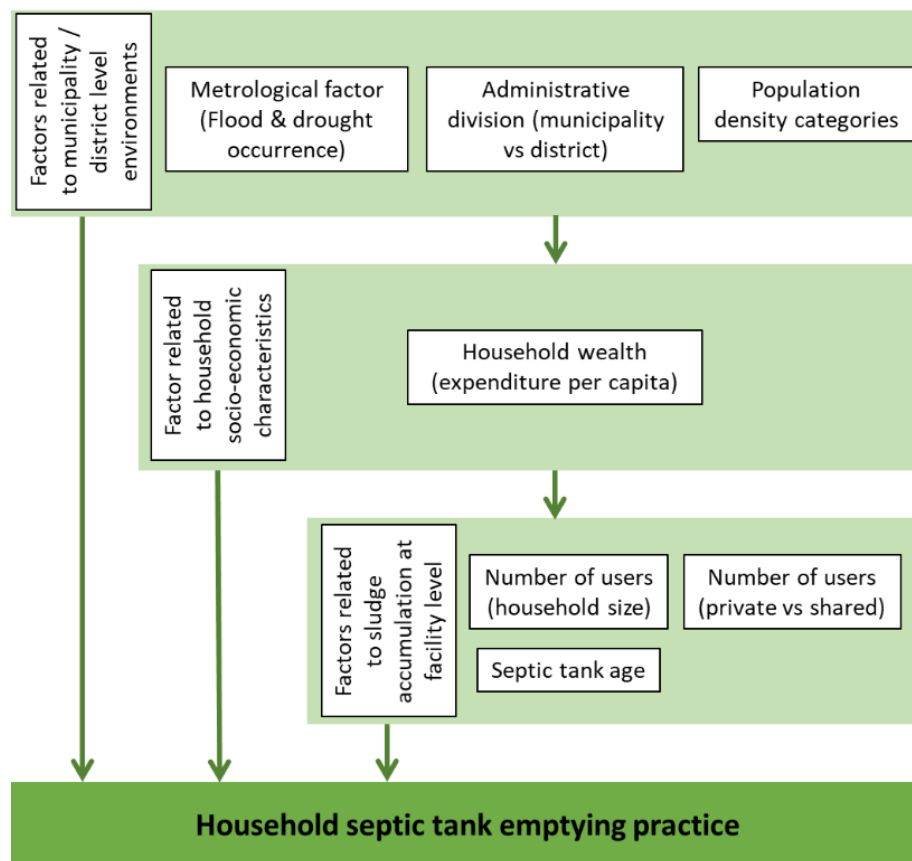

**Figure S2.** Conceptual hierarchical model of factors for household septic tank emptying practice

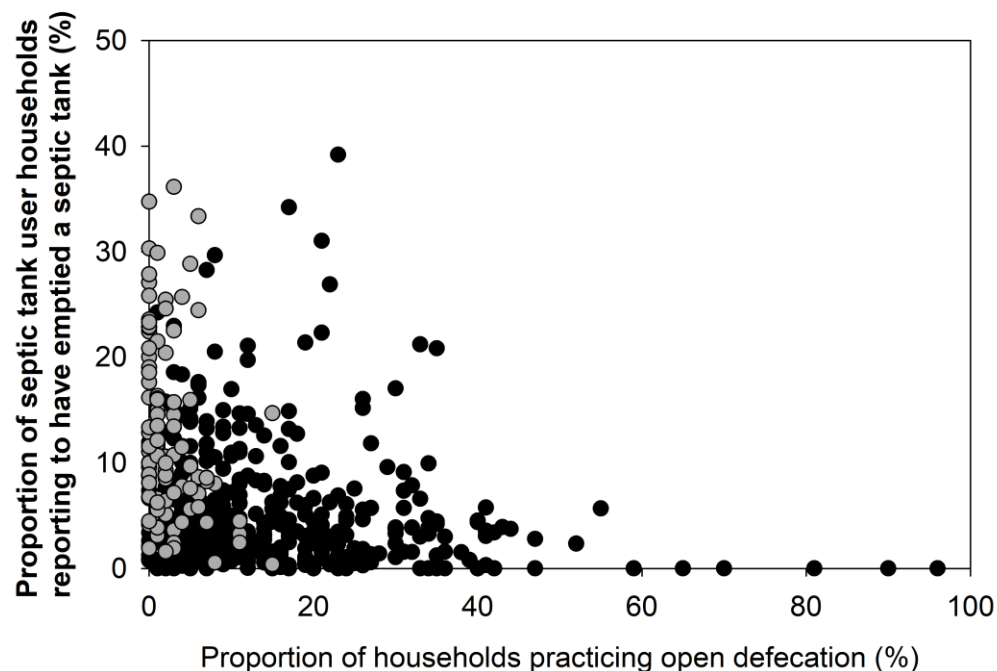

**Figure S3.** Proportion of households reporting to practice septic tank emptying over proportion of households practicing open defecation. Each dot represents one municipality (grey circle, n = 99) or district (black circle, n = 415).

**Table S1.** Municipality and district population density

| Name of municipalities and districts | Population density (people / km2) |
|--------------------------------------|-----------------------------------|
| Aceh Barat                           | 71.8                              |
| Aceh Barat Daya                      | 100.9                             |
| Aceh Besar                           | 143.2                             |
| Aceh Jaya                            | 24.4                              |
| Aceh Selatan                         | 62.0                              |
| Aceh Singkil                         | 56.8                              |
| Aceh Tamiang                         | 150.8                             |
| Aceh Tengah                          | 49.2                              |
| Aceh Tenggara                        | 51.2                              |
| Aceh Timur                           | 69.4                              |
| Aceh Utara                           | 191.4                             |
| Agam                                 | 272.3                             |
| Alor                                 | 71.8                              |
| Asahan                               | 197.1                             |
| Asmat                                | 3.0                               |
| Badung                               | 1601.0                            |
| Balangan                             | 70.0                              |
| Bandung                              | 2135.4                            |
| Bandung Barat                        | 1301.8                            |
| Banggai                              | 39.0                              |
| Banggai Kepulauan                    | 47.6                              |
| Banggai Laut                         | 103.4                             |
| Bangka                               | 114.3                             |
| Bangka Barat                         | 75.6                              |
| Bangka Selatan                       | 58.2                              |
| Bangka Tengah                        | 91.0                              |
| Bangkalan                            | 985.3                             |
| Bangli                               | 463.2                             |
| Banjarnegara                         | 126.0                             |
| Banjarnegara                         | 901.8                             |
| Bantaeng                             | 474.0                             |
| Bantul                               | 2004.2                            |
| Banyu Asin                           | 72.2                              |
| Banyumas                             | 1267.9                            |
| Banyuwangi                           | 279.1                             |
| Barito Kuala                         | 104.7                             |
| Barito Selatan                       | 15.5                              |
| Barito Timur                         | 33.1                              |
| Barito Utara                         | 15.7                              |
| Barro                                | 148.4                             |
| Batang                               | 974.6                             |
| Batang Hari                          | 47.0                              |
| Batu Bara                            | 451.6                             |

| Name of municipalities and districts | Population density (people / km2) |
|--------------------------------------|-----------------------------------|
| Kota Tasikmalaya                     | 3866.4                            |
| Kota Tebing Tinggi                   | 5303.3                            |
| Kota Tegal                           | 6298                              |
| Kota Ternate                         | 2093.6                            |
| Kota Tidore Kepulauan                | 61.6                              |
| Kota Tomohon                         | 936.2                             |
| Kota Tual                            | 297.1                             |
| Kota Yogyakarta                      | 13290.4                           |
| Kotawaringin Barat                   | 29.1                              |
| Kotawaringin Timur                   | 27.8                              |
| Kuantan Singingi                     | 62.2                              |
| Kubu Raya                            | 83.3                              |
| Kudus                                | 2049.4                            |
| Kulon Progo                          | 733.8                             |
| Kuningan                             | 973.2                             |
| Kupang                               | 74.3                              |
| Kutai Barat                          | 7.3                               |
| Kutai Kartanegara                    | 33.3                              |
| Kutai Timur                          | 10.5                              |
| Labuhan Batu                         | 229.2                             |
| Labuhan Batu Selatan                 | 94.3                              |
| Labuhan Batu Utara                   | 101.9                             |
| Lahat                                | 77.1                              |
| Lamandau                             | 12.9                              |
| Lamongan                             | 667.3                             |
| Lampung Barat                        | 141.3                             |
| Lampung Selatan                      | 1444.0                            |
| Lampung Tengah                       | 336.9                             |
| Lampung Timur                        | 196.1                             |
| Lampung Utara                        | 226.3                             |
| Landak                               | 42.3                              |
| Langkat                              | 166.4                             |
| Lanny Jaya                           | 79.6                              |
| Lebak                                | 380.2                             |
| Lebong                               | 60.7                              |
| Lembata                              | 113.0                             |
| Lima Puluh Kota                      | 107.2                             |
| Lingga                               | 39.6                              |
| Lombok Barat                         | 775.2                             |
| Lombok Tengah                        | 865.3                             |
| Lombok Timur                         | 975.5                             |
| Lombok Utara                         | 283.9                             |
| Lumajang                             | 582.1                             |

|                           |        |
|---------------------------|--------|
| Bekasi                    | 3072.9 |
| Belitung                  | 82.8   |
| Belitung Timur            | 51.7   |
| Belu                      | 171.3  |
| Bener Meriah              | 101.9  |
| Bengkalis                 | 353.0  |
| Bengkayang                | 50.3   |
| Bengkulu Selatan          | 133.6  |
| Bengkulu Tengah           | 93.7   |
| Bengkulu Utara            | 71.7   |
| Berau                     | 10.9   |
| Biak Numfor               | 58.6   |
| Bima                      | 143.5  |
| Bintan                    | 120.9  |
| Bireuen                   | 248.1  |
| Blitar                    | 868.5  |
| Blora                     | 479.3  |
| Boalemo                   | 109.7  |
| Bogor                     | 2200.8 |
| Bojonegoro                | 568.4  |
| Bolaang Mongondow         | 86.3   |
| Bolaang Mongondow Selatan | 40.9   |
| Bolaang Mongondow Timur   | 79.6   |
| Bolaang Mongondow Utara   | 47.8   |
| Bombana                   | 61.5   |
| Bondowoso                 | 508.3  |
| Bone                      | 166.4  |
| Bone Bolango              | 81.3   |
| Boven Digoel              | 2.6    |
| Boyolali                  | 976.6  |
| Brebes                    | 951.0  |
| Buleleng                  | 484.0  |
| Bulukumba                 | 327.4  |
| Bulungan                  | 10.2   |
| Bungo                     | 80.4   |
| Buol                      | 40.1   |
| Buru                      | 29.1   |
| Buru Selatan              | 16.8   |
| Buton                     | 84.6   |
| Buton Selatan             | 158.4  |
| Buton Tengah              | 97.2   |
| Buton Utara               | 34.4   |
| Ciamis                    | 844.8  |
| Cianjur                   | 589.3  |
| Cilacap                   | 813.0  |
| Cirebon                   | 2227.4 |

|                           |        |
|---------------------------|--------|
| Luwu                      | 108.3  |
| Luwu Timur                | 43.2   |
| Luwu Utara                | 41.7   |
| Madiun                    | 658.0  |
| Magelang                  | 1170.1 |
| Magetan                   | 913.1  |
| Mahakam Ulu               | 1.7    |
| Majalengka                | 1000.7 |
| Majene                    | 183.5  |
| Malaka                    | 165.3  |
| Malang                    | 738.2  |
| Malinau                   | 2.1    |
| Maluku Barat Daya         | 16.0   |
| Maluku Tengah             | 46.9   |
| Maluku Tenggara           | 96.7   |
| Maluku Tenggara Barat     | 25.3   |
| Mamasa                    | 53.9   |
| Mamberamo Raya            | 1.0    |
| Mamberamo Tengah          | 37.8   |
| Mamuju                    | 58.7   |
| Mamuju Tengah             | 44.5   |
| Mamuju Utara              | 57.3   |
| Mandailing Natal          | 72.9   |
| Manggarai                 | 161.4  |
| Manggarai Barat           | 114.6  |
| Manggarai Timur           | 108.7  |
| Manokwari                 | 55.0   |
| Manokwari Selatan         | 8.6    |
| Mappi                     | 4.3    |
| Maros                     | 218.1  |
| Maybrat                   | 7.5    |
| Melawi                    | 19.6   |
| Mempawah (Kab. Pontianak) | 94.4   |
| Merangin                  | 50.6   |
| Merauke                   | 5.2    |
| Mesuji                    | 91.7   |
| Mimika                    | 10.2   |
| Minahasa                  | 306.0  |
| Minahasa Selatan          | 149.4  |
| Minahasa Tenggara         | 150.4  |
| Minahasa Utara            | 221.7  |
| Mojokerto                 | 1557   |
| Morowali                  | 39.9   |
| Morowali Utara            | 12.8   |
| Muara Enim                | 86.2   |
| Muaro Jambi               | 83.2   |

|                     |        |
|---------------------|--------|
| Dairi               | 147.5  |
| Deiyai              | 136.2  |
| Deli Serdang        | 979.5  |
| Demak               | 1291.8 |
| Dharmas Raya        | 83.6   |
| Dogiyai             | 23.1   |
| Dompu               | 105.5  |
| Donggala            | 71.1   |
| Empat Lawang        | 110.9  |
| Ende                | 133.9  |
| Enrekang            | 115.6  |
| Fakfak              | 7.1    |
| Flores Timur        | 141.1  |
| Garut               | 853.1  |
| Gayo Lues           | 16.5   |
| Gianyar             | 1391.8 |
| Gorontalo           | 216.2  |
| Gorontalo Utara     | 68.7   |
| Gowa                | 410.3  |
| Gresik              | 1102.1 |
| Grobogan            | 684.2  |
| Gunung Kidul        | 518.9  |
| Gunung Mas          | 11.1   |
| Halmahera Barat     | 69.4   |
| Halmahera Tengah    | 21.0   |
| Halmahera Timur     | 14.5   |
| Halmahera Utara     | 49.7   |
| Halimaltera Selatan | 28.8   |
| Hulu Sungai Selatan | 131.7  |
| Hulu Sungai Tengah  | 185.1  |
| Hulu Sungai Utara   | 266.1  |
| Humbang Hasundutan  | 81.4   |
| Indragiri Hilir     | 106.2  |
| Indragiri Hulu      | 57.2   |
| Indramayu           | 847.2  |
| Intan Jaya          | 12.6   |
| Jayapura            | 11.8   |
| Jayawijaya          | 31.0   |
| Jember              | 792.5  |
| Jembrana            | 330.4  |
| Jeneponto           | 514.9  |
| Jepara              | 1187.5 |
| Jombang             | 1133.4 |
| Kaimana             | 3.7    |
| Kampar              | 79.3   |
| Kapuas              | 23.9   |

|                           |        |
|---------------------------|--------|
| Mukomuko                  | 48.0   |
| Muna                      | 118.3  |
| Muna Barat                | 76.7   |
| Murung Raya               | 5.1    |
| Musi Banyuasin            | 45.4   |
| Musi Rawas                | 63.6   |
| Musi Rawas Utara          | 32.0   |
| Nabire                    | 13.5   |
| Nagan Raya                | 49.7   |
| Nagekeo                   | 102.9  |
| Natuna                    | 38.7   |
| Nduga                     | 45.5   |
| Ngada                     | 99.2   |
| Nganjuk                   | 861.4  |
| Ngawi                     | 640.5  |
| Nias                      | 75.3   |
| Nias Barat                | 183.0  |
| Nias Selatan              | 175.3  |
| Nias Utara                | 114.7  |
| Nunukan                   | 15.2   |
| Ogan Ilir                 | 161.3  |
| Ogan Komering Ilir        | 45.2   |
| Ogan Komering Ulu         | 76.7   |
| Ogan Komering Ulu Selatan | 65.7   |
| Ogan Komering Ulu Timur   | 200.8  |
| Pacitan                   | 399.5  |
| Padang Lawas              | 72.2   |
| Padang Lawas Utara        | 69.6   |
| Padang Pariaman           | 311.9  |
| Pakpak Bharat             | 40.2   |
| Pamekasan                 | 1110.8 |
| Pandeglang                | 441.2  |
| Pangandaran               | 395.3  |
| Pangkajene Kepulauan      | 296.4  |
| Paniai                    | 27.2   |
| Parigi Moutong            | 96.4   |
| Pasaman                   | 71.2   |
| Pasaman Barat             | 114.1  |
| Paser                     | 37.0   |
| Pasuruan                  | 1104.1 |
| Pati                      | 845.8  |
| Pegunungan Arfak          | 11.2   |
| Pegunungan Bintang        | 4.8    |
| Pekalongan                | 1072.5 |
| Pelalawan                 | 37.9   |
| Pemalang                  | 1165.3 |

|                     |         |
|---------------------|---------|
| Kapuas Hulu         | 8.8     |
| Karang Asem         | 496.3   |
| Karanganyar         | 1143.2  |
| Karawang            | 1424.7  |
| Karimun             | 255.1   |
| Karo                | 195.5   |
| Katingan            | 9.7     |
| Kaur                | 51.2    |
| Kayong Utara        | 24.7    |
| Kebumen             | 988.6   |
| Kediri              | 1135.8  |
| Keerom              | 6.8     |
| Kendal              | 868.5   |
| Kepahiang           | 206.3   |
| Kepulauan Anambas   | 71.7    |
| Kepulauan Aru       | 11.8    |
| Kepulauan Mentawai  | 15.3    |
| Kepulauan Meranti   | 50.0    |
| Kepulauan Sangihe   | 284.5   |
| Kepulauan Seribu    | 2386.5  |
| Kepulauan Sula      | 31.1    |
| Kepulauan Talaud    | 74.6    |
| Kerinci             | 71.1    |
| Ketapang            | 16.4    |
| Klaten              | 1785.1  |
| Klungkung           | 568.5   |
| Kolaka              | 61.6    |
| Kolaka Timur        | 53.1    |
| Kolaka Utara        | 44.5    |
| Konawe              | 57.4    |
| Konawe Kepulauan    | 39.4    |
| Konawe Selatan      | 54.5    |
| Konawe Utara        | 12.5    |
| Kota Ambon          | 1602.8  |
| Kota Balikpapan     | 1243.2  |
| Kota Banda Aceh     | 4405.5  |
| Kota Bandar Lampung | 3552.4  |
| Kota Bandung        | 14957.3 |
| Kota Banjar         | 1613.4  |
| Kota Banjar Baru    | 708.1   |
| Kota Banjarmasin    | 9841.8  |
| Kota Baru           | 36.1    |
| Kota Batam          | 1433.0  |
| Kota Batu           | 1517.4  |
| Kota Bau-Bau        | 777.4   |
| Kota Bekasi         | 14539.1 |

|                            |        |
|----------------------------|--------|
| Penajam Paser Utara        | 48.3   |
| Penukal Abab Lematang Ilir | 103.1  |
| Pesawaran                  | 198.1  |
| Pesisir Barat              | 53.3   |
| Pesisir Selatan            | 80.7   |
| Pidie                      | 144.1  |
| Pidie Jaya                 | 150.2  |
| Pinrang                    | 192.2  |
| Pohuwato                   | 38.0   |
| Poliwali Mandar            | 249.2  |
| Ponorogo                   | 667.4  |
| Poso                       | 36.0   |
| Pringsewu                  | 640.3  |
| Probolinggo                | 688.9  |
| Pulang Pisau               | 14.1   |
| Pulau Morotai              | 27.2   |
| Pulau Taliabu              | 36.1   |
| Puncak                     | 14.1   |
| Puncak Jaya                | 25.9   |
| Purbalingga                | 1378.5 |
| Purwakarta                 | 1166.1 |
| Purworejo                  | 658.1  |
| Raja Ampat                 | 6.0    |
| Rejang Lebong              | 159.1  |
| Rembang                    | 719.4  |
| Rokan Hilir                | 80.4   |
| Rokan Hulu                 | 91.2   |
| Rote Ndao                  | 134.5  |
| Sabu Raijua                | 211.4  |
| Sambas                     | 79.8   |
| Samosir                    | 61.0   |
| Sampang                    | 793.8  |
| Sanggau                    | 36.6   |
| Sarmi                      | 2.3    |
| Sarolangun                 | 48.8   |
| Sekadau                    | 37.0   |
| Selayar                    | 99.9   |
| Seluma                     | 80.7   |
| Semarang                   | 1109   |
| Seram Bagian Barat         | 34.1   |
| Seram Bagian Timur         | 17.8   |
| Serang                     | 869.8  |
| Serdang Bedagai            | 324.4  |
| Seruyan                    | 12.6   |
| Siak                       | 59.2   |
| Siau Tagulandang Biaro     | 240.7  |

|                      |         |
|----------------------|---------|
| Kota Bengkulu        | 2538.8  |
| Kota Bima            | 778.5   |
| Kota Binjai          | 4673.0  |
| Kota Bitung          | 723.0   |
| Kota Blitar          | 4356.0  |
| Kota Bogor           | 9384.6  |
| Kota Bontang         | 437.0   |
| Kota Bukittinggi     | 5181.2  |
| Kota Cilegon         | 2491.2  |
| Kota Cimahi          | 15643.1 |
| Kota Cirebon         | 8546.9  |
| Kota Denpasar        | 7412.1  |
| Kota Depok           | 12016.7 |
| Kota Dumai           | 190.2   |
| Kota Gorontalo       | 2756.6  |
| Kota Gunungsitoli    | 507.3   |
| Kota Jakarta Barat   | 20812.7 |
| Kota Jakarta Pusat   | 17718.8 |
| Kota Jakarta Selatan | 14675.3 |
| Kota Jakarta Timur   | 16080.2 |
| Kota Jakarta Utara   | 12950.3 |
| Kota Jambi           | 5840.6  |
| Kota Jayapura        | 320.7   |
| Kota Kediri          | 4533.3  |
| Kota Kendari         | 1305.6  |
| Kota Kotamobagu      | 1886.4  |
| Kota Kupang          | 16614.7 |
| Kota Langsa          | 673.8   |
| Kota Lhokseumawe     | 1144.4  |
| Kota Lubuklinggau    | 578.4   |
| Kota Madiun          | 5218.4  |
| Kota Magelang        | 7603.4  |
| Kota Makassar        | 7661.7  |
| Kota Malang          | 5993.1  |
| Kota Manado          | 2757.3  |
| Kota Mataram         | 7939.9  |
| Kota Medan           | 8603.4  |
| Kota Metro           | 2709.4  |
| Kota Mojokerto       | 7833.3  |
| Kota Padang          | 1370.8  |
| Kota Padang Panjang  | 2334.5  |
| Kota Padangsidimpuan | 1934.7  |
| Kota Pagar Alam      | 219.7   |
| Kota Palangka Raya   | 121.6   |
| Kota Palembang       | 4503.8  |
| Kota Palopo          | 729.7   |

|                     |        |
|---------------------|--------|
| Sidenreng Rappang   | 160.3  |
| Sidoarjo            | 3545.9 |
| Sigi                | 46.1   |
| Sijunjung           | 75.8   |
| Sikka               | 185.0  |
| Simalungun          | 198.7  |
| Simeulue            | 45.4   |
| Sinjai              | 305.6  |
| Sintang             | 19.4   |
| Situbondo           | 409.0  |
| Sleman              | 2121.8 |
| Solok               | 99.9   |
| Solok Selatan       | 51.1   |
| Soppeng             | 145.8  |
| Sorong              | 13.6   |
| Sorong Selatan      | 7.1    |
| Sragen              | 945.8  |
| Subang              | 842.6  |
| Sukabumi            | 594.9  |
| Sukamara            | 16.8   |
| Sukoharjo           | 1823.5 |
| Sumba Barat         | 59.4   |
| Sumba Barat Daya    | 232.8  |
| Sumba Tengah        | 39.0   |
| Sumba Timur         | 36.9   |
| Sumbawa             | 68.9   |
| Sumbawa Barat       | 80.4   |
| Sumedang            | 759.0  |
| Sumenep             | 544.9  |
| Supiori             | 30.5   |
| Tabalong            | 67.5   |
| Tabanan             | 439.6  |
| Takalar             | 527.1  |
| Tambraw             | 1.2    |
| Tana Tidung         | 6.0    |
| Tana Toraja         | 117.6  |
| Tanah Bumbu         | 71.9   |
| Tanah Datar         | 260.6  |
| Tanah Laut          | 94.7   |
| Tangerang           | 3756.2 |
| Tanggamus           | 198.1  |
| TanjungJabung Barat | 71.8   |
| TanjungJabung Timur | 40.4   |
| Tapanuli Selatan    | 46.8   |
| Tapanuli Tengah     | 172.2  |
| Tapanuli Utara      | 79.6   |

|                        |         |
|------------------------|---------|
| Kota Palu              | 990.7   |
| Kota Pangkal Pinang    | 2379.5  |
| Kota Pare-Pare         | 1461.6  |
| Kota Pariaman          | 1338.3  |
| Kota Pasuruan          | 5679.3  |
| Kota Payakumbuh        | 1590.9  |
| Kota Pekalongan        | 6786.7  |
| Kota Pekanbaru         | 1808.3  |
| Kota Pematang Siantar  | 4587.1  |
| Kota Pontianak         | 5998.7  |
| Kota Prabumulih        | 741.6   |
| Kota Probolinggo       | 4185.8  |
| Kota Sabang            | 227.9   |
| Kota Salatiga          | 3383.6  |
| Kota Samarinda         | 1114.6  |
| Kota Sawah Lunto       | 269.6   |
| Kota Semarang          | 4853.4  |
| Kota Serang            | 2581.8  |
| Kota Sibolga           | 2121.2  |
| Kota Singkawang        | 442.3   |
| Kota Solok             | 996.1   |
| Kota Sorong            | 387.1   |
| Kota Subulussalam      | 58.5    |
| Kota Sukabumi          | 6812    |
| Kota Sungai Penuh      | 232.2   |
| Kota Surabaya          | 8262.1  |
| Kota Surakarta         | 11292.9 |
| Kota Tangerang         | 14486.5 |
| Kota Tangerang Selatan | 11875.2 |
| Kota Tanjung Balai     | 1625.0  |
| Kota Tanjung Pinang    | 1463.6  |
| Kota Tarakan           | 1080.1  |

|                      |        |
|----------------------|--------|
| Tapin                | 70.9   |
| Tasikmalaya          | 687.6  |
| Tebo                 | 54.9   |
| Tegal                | 1644.4 |
| Teluk Bintuni        | 3.1    |
| Teluk Wondama        | 8.2    |
| Temanggung           | 921.6  |
| Timor Tengah Selatan | 118.6  |
| Timor Tengah Utara   | 95.2   |
| Toba Samosir         | 78.9   |
| Tojo Una-Una         | 26.9   |
| Toli-Toli            | 57.8   |
| Tolikara             | 24.9   |
| Toraja Utara         | 190.2  |
| Trenggalek           | 606.9  |
| Tuban                | 639.4  |
| Tulangbawang         | 130.1  |
| Tulangbawang Barat   | 227.5  |
| Tulungagung          | 984.5  |
| Wajo                 | 158.9  |
| Wakatobi             | 171.4  |
| Waropen              | 2.9    |
| Way Kanan            | 114.8  |
| Wonogiri             | 534.9  |
| Wonosobo             | 805.5  |
| Yahukimo             | 11.1   |
| Yalimo               | 50.0   |
| Yapen Waropen        | 49.4   |
